# Supplementary material
Source: HighWire-hosted journal article supplement (https://erj.ersjournals.com/content/58/1/2003599)
Supplement: inline-supplementary-material-1 [file inline-supplementary-material-1.pdf]

## Supplementary material

Supplementary table S1. Demographic and clinical characteristics for 2-18 year olds. Values are n (%).

|                                                              | Total<br>(n= 6,632) | Treatment at Index Prescription Date |                               | p-value |
|--------------------------------------------------------------|---------------------|--------------------------------------|-------------------------------|---------|
|                                                              |                     | OCS<br>(n=4,538)                     | OCS + Antibiotic<br>(n=2,094) |         |
| <b>Age, yrs</b>                                              |                     |                                      |                               |         |
| 2-5                                                          | 909 (13.7%)         | 624 (13.8%)                          | 285 (13.6%)                   | < 0.001 |
| 6-12                                                         | 3,502 (52.8%)       | 2,468 (54.4%)                        | 1,034 (49.4%)                 |         |
| 13-18                                                        | 2,221 (33.5%)       | 1,446 (31.9%)                        | 775 (37.0%)                   |         |
| <b>Sex</b>                                                   |                     |                                      |                               |         |
| Female                                                       | 2,593 (39.1%)       | 1,780 (39.2%)                        | 813 (38.8%)                   | 0.780   |
| Male                                                         | 4,039 (60.9%)       | 2,758 (60.8%)                        | 1,281 (61.2%)                 |         |
| <b>z-score Body Mass Index</b>                               |                     |                                      |                               |         |
| Underweight                                                  | 233 (4.6%)          | 158 (4.6%)                           | 75 (4.5%)                     | 0.011   |
| Normal                                                       | 2,935 (57.7%)       | 1,985 (57.9%)                        | 950 (57.2%)                   |         |
| Overweight                                                   | 1,011 (19.9%)       | 664 (19.4%)                          | 347 (20.9%)                   |         |
| Obese                                                        | 909 (17.9%)         | 621 (18.1%)                          | 288 (17.3%)                   |         |
| Missing                                                      | 1,544 (23.3%)       | 1,110 (24.5%)                        | 434 (20.7%)                   |         |
| <b>Smoking status</b>                                        |                     |                                      |                               |         |
| Current Smoker                                               | 276 (4.6%)          | 141 (3.4%)                           | 135 (7.2%)                    | < 0.001 |
| Ex-Smoker                                                    | 241 (4.0%)          | 175 (4.3%)                           | 66 (3.5%)                     |         |
| Non-Smoker                                                   | 5,456 (91.3%)       | 3,778 (92.3%)                        | 1,678 (89.3%)                 |         |
| Missing                                                      | 659 (9.9%)          | 444 (9.8%)                           | 215 (10.3%)                   |         |
| <b>Global initiative for Asthma (GINA) category</b>          |                     |                                      |                               |         |
| Step 2                                                       | 2,461 (37.1%)       | 1,660 (36.6%)                        | 801 (38.3%)                   | 0.110   |
| Step 3                                                       | 2,634 (39.7%)       | 1,794 (39.5%)                        | 840 (40.1%)                   |         |
| Step 4                                                       | 1,537 (23.2%)       | 1,084 (23.9%)                        | 453 (21.6%)                   |         |
| <b>Eosinophil Count (x10<sup>9</sup>/L)</b>                  |                     |                                      |                               |         |
| >0 to 0.2                                                    | 201 (27.4%)         | 129 (26.6%)                          | 72 (28.9%)                    | 0.33    |
| >0.2 to 0.4                                                  | 191 (26.0%)         | 127 (26.2%)                          | 64 (25.7%)                    |         |
| >0.4 to 0.6                                                  | 129 (17.6%)         | 90 (18.6%)                           | 39 (15.7%)                    |         |
| >0.6 to 0.8                                                  | 88 (12.0%)          | 55 (11.3%)                           | 33 (13.3%)                    |         |
| >0.8 to 1                                                    | 46 (6.3%)           | 36 (7.4%)                            | 10 (4.0%)                     |         |
| >1                                                           | 79 (10.8%)          | 48 (9.9%)                            | 31 (12.4%)                    |         |
| Missing                                                      | 5,898 (88.9%)       | 4,053 (89.3%)                        | 1,845 (88.1%)                 |         |
| <b>Season of Index Prescription Date</b>                     |                     |                                      |                               |         |
| Autumn                                                       | 1,958 (29.5%)       | 1,298 (28.6%)                        | 660 (31.5%)                   | < 0.001 |
| Winter                                                       | 1,932 (29.1%)       | 1,257 (27.7%)                        | 675 (32.2%)                   |         |
| Spring                                                       | 1,438 (21.7%)       | 1,017 (22.4%)                        | 421 (20.1%)                   |         |
| Summer                                                       | 1,304 (19.7%)       | 966 (21.3%)                          | 338 (16.1%)                   |         |
| <b>Year of Index Prescription Date</b>                       |                     |                                      |                               |         |
| 2004-2006                                                    | 2,328 (35.1%)       | 1,668 (36.8%)                        | 660 (31.5%)                   | < 0.001 |
| 2007-2009                                                    | 2,178 (32.8%)       | 1,486 (32.8%)                        | 692 (33.1%)                   |         |
| 2010-2012                                                    | 1,556 (23.5%)       | 1,004 (22.1%)                        | 552 (26.4%)                   |         |
| 2013-2014                                                    | 570 (8.6%)          | 380 (8.4%)                           | 190 (9.1%)                    |         |
| <b>Number of asthma/wheeze consults in baseline 6 months</b> |                     |                                      |                               |         |
| <b>total</b>                                                 |                     |                                      |                               |         |
| 0                                                            | 2,437 (36.8%)       | 1,647 (36.3%)                        | 790 (37.7%)                   | 0.460   |
| 1-5                                                          | 4,079 (61.5%)       | 2,813 (62.0%)                        | 1,266 (60.5%)                 |         |
| 6-10                                                         | 107 (1.6%)          | 73 (1.6%)                            | 34 (1.6%)                     |         |
| 11-15                                                        | 8 (0.1%)            | 5 (0.1%)                             | 3 (0.1%)                      |         |
| 16-20                                                        | 1 (0.0%)            | 0 (0.0%)                             | 1 (0.1%)                      |         |
| <b>with Short-Acting Beta Agonist (SABA) prescription</b>    |                     |                                      |                               |         |
| 0                                                            | 2,437 (36.8%)       | 1,647 (36.3%)                        | 790 (37.7%)                   | 0.110   |
| 1                                                            | 3,229 (48.7%)       | 2,203 (48.6%)                        | 1,026 (49.0%)                 |         |
| 2                                                            | 966 (14.6%)         | 688 (15.2%)                          | 278 (13.3%)                   |         |
| <b>with antibiotic prescription</b>                          |                     |                                      |                               |         |
| 0                                                            | 6,024 (90.8%)       | 4,144 (91.3%)                        | 1,880 (89.8%)                 | 0.074   |
| 1                                                            | 562 (8.5%)          | 368 (8.1%)                           | 194 (9.3%)                    |         |
| 2                                                            | 44 (0.7%)           | 24 (0.5%)                            | 20 (1.0%)                     |         |
| 3                                                            | 1 (0.0%)            | 1 (0.0%)                             | 0 (0.0%)                      |         |
| 4                                                            | 1 (0.0%)            | 1 (0.0%)                             | 0 (0.0%)                      |         |

OCS: Oral Corticosteroids. Percentages are given as non-missing.

Supplementary table S2. Demographic and clinical characteristics for 19-65 year olds. Values are n (%).

|                                                              | Total<br>(n= 22,005) | Treatment at Index Prescription Date |                                | p-value |
|--------------------------------------------------------------|----------------------|--------------------------------------|--------------------------------|---------|
|                                                              |                      | OCS<br>(n=11,993)                    | OCS + Antibiotic<br>(n=10,012) |         |
| <b>Age, yrs</b>                                              |                      |                                      |                                |         |
| 19-25                                                        | 1,956 (8.9%)         | 1,176 (9.8%)                         | 780 (7.8%)                     | < 0.001 |
| 26-35                                                        | 3,904 (17.7%)        | 2,288 (19.1%)                        | 1,616 (16.1%)                  |         |
| 36-45                                                        | 5,723 (26.0%)        | 3,224 (26.9%)                        | 2,499 (25.0%)                  |         |
| 46-55                                                        | 5,417 (24.6%)        | 2,830 (23.6%)                        | 2,587 (25.8%)                  |         |
| 56-65                                                        | 5,005 (22.7%)        | 2,475 (20.6%)                        | 2,530 (25.3%)                  |         |
| <b>Sex</b>                                                   |                      |                                      |                                |         |
| Female                                                       | 14,407 (65.5%)       | 7,958 (66.4%)                        | 6,449 (64.4%)                  | 0.003   |
| Male                                                         | 7,598 (34.5%)        | 4,035 (33.6%)                        | 3,563 (35.6%)                  |         |
| <b>Body Mass Index</b>                                       |                      |                                      |                                |         |
| Underweight                                                  | 381 (1.8%)           | 216 (1.8%)                           | 165 (1.7%)                     | 0.004   |
| Normal                                                       | 5,810 (27.0%)        | 3,274 (27.9%)                        | 2,536 (25.9%)                  |         |
| Overweight                                                   | 6,910 (32.1%)        | 3,757 (32.1%)                        | 3,153 (32.2%)                  |         |
| Obese                                                        | 8,417 (39.1%)        | 4,474 (38.2%)                        | 3,943 (40.2%)                  |         |
| Missing                                                      | 487 (2.2%)           | 272 (2.3%)                           | 215 (2.1%)                     |         |
| <b>Smoking status</b>                                        |                      |                                      |                                |         |
| Current Smoker                                               | 4,854 (22.4%)        | 2,335 (19.9%)                        | 2,519 (25.6%)                  | < 0.001 |
| Ex-Smoker                                                    | 5,782 (26.8%)        | 3,132 (26.6%)                        | 2,650 (26.9%)                  |         |
| Non-Smoker                                                   | 10,978 (50.8%)       | 6,291 (53.5%)                        | 4,687 (47.6%)                  |         |
| Missing                                                      | 391 (1.8%)           | 235 (2.0%)                           | 156 (1.6%)                     |         |
| <b>Global initiative for Asthma (GINA) category</b>          |                      |                                      |                                |         |
| Step 2                                                       | 6,471 (29.4%)        | 3,517 (29.3%)                        | 2,954 (29.5%)                  | 0.960   |
| Step 3                                                       | 6,104 (27.7%)        | 3,329 (27.8%)                        | 2,775 (27.7%)                  |         |
| Step 4                                                       | 9,430 (42.9%)        | 5,147 (42.9%)                        | 4,283 (42.8%)                  |         |
| <b>Eosinophil Count (x10<sup>9</sup>/L)</b>                  |                      |                                      |                                |         |
| >0 to 0.2                                                    | 5,658 (48.2%)        | 3,066 (48.5%)                        | 2,592 (47.9%)                  | 0.090   |
| >0.2 to 0.4                                                  | 3,940 (33.6%)        | 2,099 (33.2%)                        | 1,841 (34.0%)                  |         |
| >0.4 to 0.6                                                  | 1,390 (11.8%)        | 725 (11.5%)                          | 665 (12.3%)                    |         |
| >0.6 to 0.8                                                  | 450 (3.8%)           | 270 (4.3%)                           | 180 (3.3%)                     |         |
| >0.8 to 1                                                    | 164 (1.4%)           | 91 (1.4%)                            | 73 (1.3%)                      |         |
| >1                                                           | 134 (1.1%)           | 74 (1.2%)                            | 60 (1.1%)                      |         |
| Missing                                                      | 10,269 (46.7%)       | 5,668 (47.3%)                        | 4,601 (46.0%)                  |         |
| <b>Season of Index Prescription Date</b>                     |                      |                                      |                                |         |
| Autumn                                                       | 5,823 (26.5%)        | 3,178 (26.5%)                        | 2,645 (26.4%)                  | < 0.001 |
| Winter                                                       | 6,981 (31.7%)        | 3,474 (29.0%)                        | 3,507 (35.0%)                  |         |
| Spring                                                       | 4,806 (21.8%)        | 2,661 (22.2%)                        | 2,145 (21.4%)                  |         |
| Summer                                                       | 4,395 (20.0%)        | 2,680 (22.4%)                        | 1,715 (17.1%)                  |         |
| <b>Year of Index Prescription Date</b>                       |                      |                                      |                                |         |
| 2004-2006                                                    | 6,780 (30.8%)        | 4,050 (33.8%)                        | 2,730 (27.3%)                  | < 0.001 |
| 2007-2009                                                    | 7,169 (32.6%)        | 3,970 (33.1%)                        | 3,199 (32.0%)                  |         |
| 2010-2012                                                    | 5,586 (25.4%)        | 2,812 (23.5%)                        | 2,774 (27.7%)                  |         |
| 2013-2014                                                    | 2,470 (11.2%)        | 1,161 (9.7%)                         | 1,309 (13.1%)                  |         |
| <b>Number of asthma/wheeze consults in baseline 6 months</b> |                      |                                      |                                |         |
| <b>total</b>                                                 |                      |                                      |                                |         |
| 0                                                            | 10,304 (46.8%)       | 5,483 (45.7%)                        | 4,821 (48.2%)                  | 0.003   |
| 1-5                                                          | 11,351 (51.6%)       | 6,324 (52.7%)                        | 5,027 (50.2%)                  |         |
| 6-10                                                         | 306 (1.4%)           | 162 (1.4%)                           | 144 (1.4%)                     |         |
| 11-15                                                        | 38 (0.2%)            | 19 (0.2%)                            | 19 (0.2%)                      |         |
| 16-20                                                        | 5 (0.0%)             | 4 (0.0%)                             | 1 (0.0%)                       |         |
| 26-30                                                        | 1 (0.0%)             | 1 (0.0%)                             | 0 (0.0%)                       |         |
| <b>with Short-Acting Beta Agonist (SABA) prescription</b>    |                      |                                      |                                |         |
| 0                                                            | 10,304 (46.8%)       | 5,483 (45.7%)                        | 4,821 (48.2%)                  | < 0.001 |
| 1                                                            | 9,654 (43.9%)        | 5,332 (44.5%)                        | 4,322 (43.2%)                  |         |
| 2                                                            | 2,047 (9.3%)         | 1,178 (9.8%)                         | 869 (8.7%)                     |         |
| <b>with antibiotic prescription</b>                          |                      |                                      |                                |         |
| 0                                                            | 20,114 (91.4%)       | 10,909 (91.0%)                       | 9,205 (91.9%)                  | 0.098   |
| 1                                                            | 1,713 (7.8%)         | 983 (8.2%)                           | 730 (7.3%)                     |         |
| 2                                                            | 150 (0.7%)           | 84 (0.7%)                            | 66 (0.7%)                      |         |
| 3                                                            | 23 (0.1%)            | 13 (0.1%)                            | 10 (0.1%)                      |         |
| 4                                                            | 5 (0.0%)             | 4 (0.0%)                             | 1 (0.0%)                       |         |

OCS: Oral Corticosteroids. Percentages are given as non-missing.

Supplementary table S3. Comorbidities for 2-18 year olds and 19-65 year olds

| <b>19-65 year olds</b>    |               |               |                             |                |
|---------------------------|---------------|---------------|-----------------------------|----------------|
|                           | <b>Total</b>  | <b>OCS</b>    | <b>OCS +<br/>Antibiotic</b> | <b>p-value</b> |
|                           | (n=22,005)    | (n=11,993)    | (n=10,012)                  |                |
| COPD                      | 0 (0.0%)      | 0 (0.0%)      | 0 (0.0%)                    | 1.000          |
| Active rhinitis           | 3,218 (14.6%) | 1,885 (15.7%) | 1,333 (13.3%)               | < 0.001        |
| Active GERD               | 1,071 (4.9%)  | 544 (4.5%)    | 527 (5.3%)                  | 0.013          |
| Active eczema             | 927 (4.2%)    | 536 (4.5%)    | 391 (3.9%)                  | 0.040          |
| Osteoporosis              | 246 (1.1%)    | 127 (1.1%)    | 119 (1.2%)                  | 0.370          |
| Chronic Kidney Disease    | 226 (1.0%)    | 114 (1.0%)    | 112 (1.1%)                  | 0.230          |
| Diabetes                  | 940 (4.3%)    | 478 (4.0%)    | 462 (4.6%)                  | 0.023          |
| Hypertension              | 1124 (5.1%)   | 584 (4.9%)    | 540 (5.4%)                  | 0.080          |
| Ischaemic Heart Disease   | 625 (2.8%)    | 311 (2.6%)    | 314 (3.1%)                  | 0.016          |
| Cardiovascular Disease    | 1,437 (6.5%)  | 728 (6.1%)    | 709 (7.1%)                  | 0.003          |
| Heart Failure             | 50 (0.2%)     | 23 (0.2%)     | 27 (0.3%)                   | 0.260          |
| Myocardial Infarction     | 184 (0.8%)    | 92 (0.8%)     | 92 (0.9%)                   | 0.230          |
| Cerebrovascular Disease   | 271 (1.2%)    | 126 (1.1%)    | 145 (1.4%)                  | 0.008          |
| Anxiety and/or Depression | 1,887 (8.6%)  | 1,038 (8.7%)  | 849 (8.5%)                  | 0.650          |
| <b>2-18 year olds</b>     |               |               |                             |                |
|                           | <b>Total</b>  | <b>OCS</b>    | <b>OCS +<br/>Antibiotic</b> | <b>p-value</b> |
|                           | (n =6,632)    | (n=4,538)     | (n=2,094)                   |                |
| Active rhinitis           | 909 (13.7%)   | 624 (13.8%)   | 285 (13.6%)                 | 0.910          |
| Active eczema             | 599 (9.0%)    | 406 (8.9%)    | 193 (9.2%)                  | 0.710          |

OCS: Oral Corticosteroids; COPD: Chronic Obstructive Pulmonary Disease; GERD: Gastroesophageal Reflux Disease.

Supplementary table S4. Comorbidities for 2-18 year olds and 19-65 year olds, following propensity score matching

| <b>19-65 year olds</b>    |               |               |                             |                |
|---------------------------|---------------|---------------|-----------------------------|----------------|
|                           | <b>Total</b>  | <b>OCS</b>    | <b>OCS +<br/>Antibiotic</b> | <b>p-value</b> |
|                           | (n=20,024)    | (n=10,012)    | (n=10,012)                  |                |
| COPD                      | 0 (0.0%)      | 0 (0.0%)      | 0 (0.0%)                    | 1.0            |
| Active rhinitis           | 2,879 (14.4%) | 1,546 (15.4%) | 1,333 (13.3%)               | < 0.001        |
| Active GERD               | 1,015 (5.1%)  | 488 (4.9%)    | 527 (5.3%)                  | 0.22           |
| Active eczema             | 829 (4.1%)    | 438 (4.4%)    | 391 (3.9%)                  | 0.10           |
| Osteoporosis              | 231 (1.2%)    | 112 (1.1%)    | 119 (1.2%)                  | 0.69           |
| Chronic Kidney Disease    | 213 (1.1%)    | 101 (1.0%)    | 112 (1.1%)                  | 0.49           |
| Diabetes                  | 904 (4.5%)    | 442 (4.4%)    | 462 (4.6%)                  | 0.52           |
| Hypertension              | 1,077 (5.4%)  | 537 (5.4%)    | 540 (5.4%)                  | 0.95           |
| Ischaemic Heart Disease   | 597 (3.0%)    | 283 (2.8%)    | 314 (3.1%)                  | 0.21           |
| Cardiovascular Disease    | 1,365 (6.8%)  | 656 (6.6%)    | 709 (7.1%)                  | 0.14           |
| Heart Failure             | 49 (0.2%)     | 22 (0.2%)     | 27 (0.3%)                   | 0.57           |
| Myocardial Infarction     | 179 (0.9%)    | 87 (0.9%)     | 92 (0.9%)                   | 0.76           |
| Cerebrovascular Disease   | 259 (1.3%)    | 114 (1.1%)    | 145 (1.4%)                  | 0.06           |
| Anxiety and/or Depression | 1,717 (8.6%)  | 868 (8.7%)    | 849 (8.5%)                  | 0.65           |
| <b>2-18 year olds</b>     |               |               |                             |                |
|                           | <b>Total</b>  | <b>OCS</b>    | <b>OCS +<br/>Antibiotic</b> | <b>p-value</b> |
|                           | (n =4,184)    | (n=2,092)     | (n=2,092)                   |                |
| Active rhinitis           | 561 (13.4%)   | 277 (13.2%)   | 284 (13.6%)                 | 0.79           |
| Active eczema             | 367 (8.8%)    | 175 (8.4%)    | 192 (9.2%)                  | 0.38           |

OCS: Oral Corticosteroids; COPD: Chronic Obstructive Pulmonary Disease; GERD: Gastroesophageal Reflux Disease.
