# Supplementary material
Source: HighWire-hosted journal article supplement (https://erj.ersjournals.com/content/58/1/2003599)
Supplement: inline-supplementary-material-2 [file inline-supplementary-material-2.pdf]

Supplementary figure 1. Patient flow

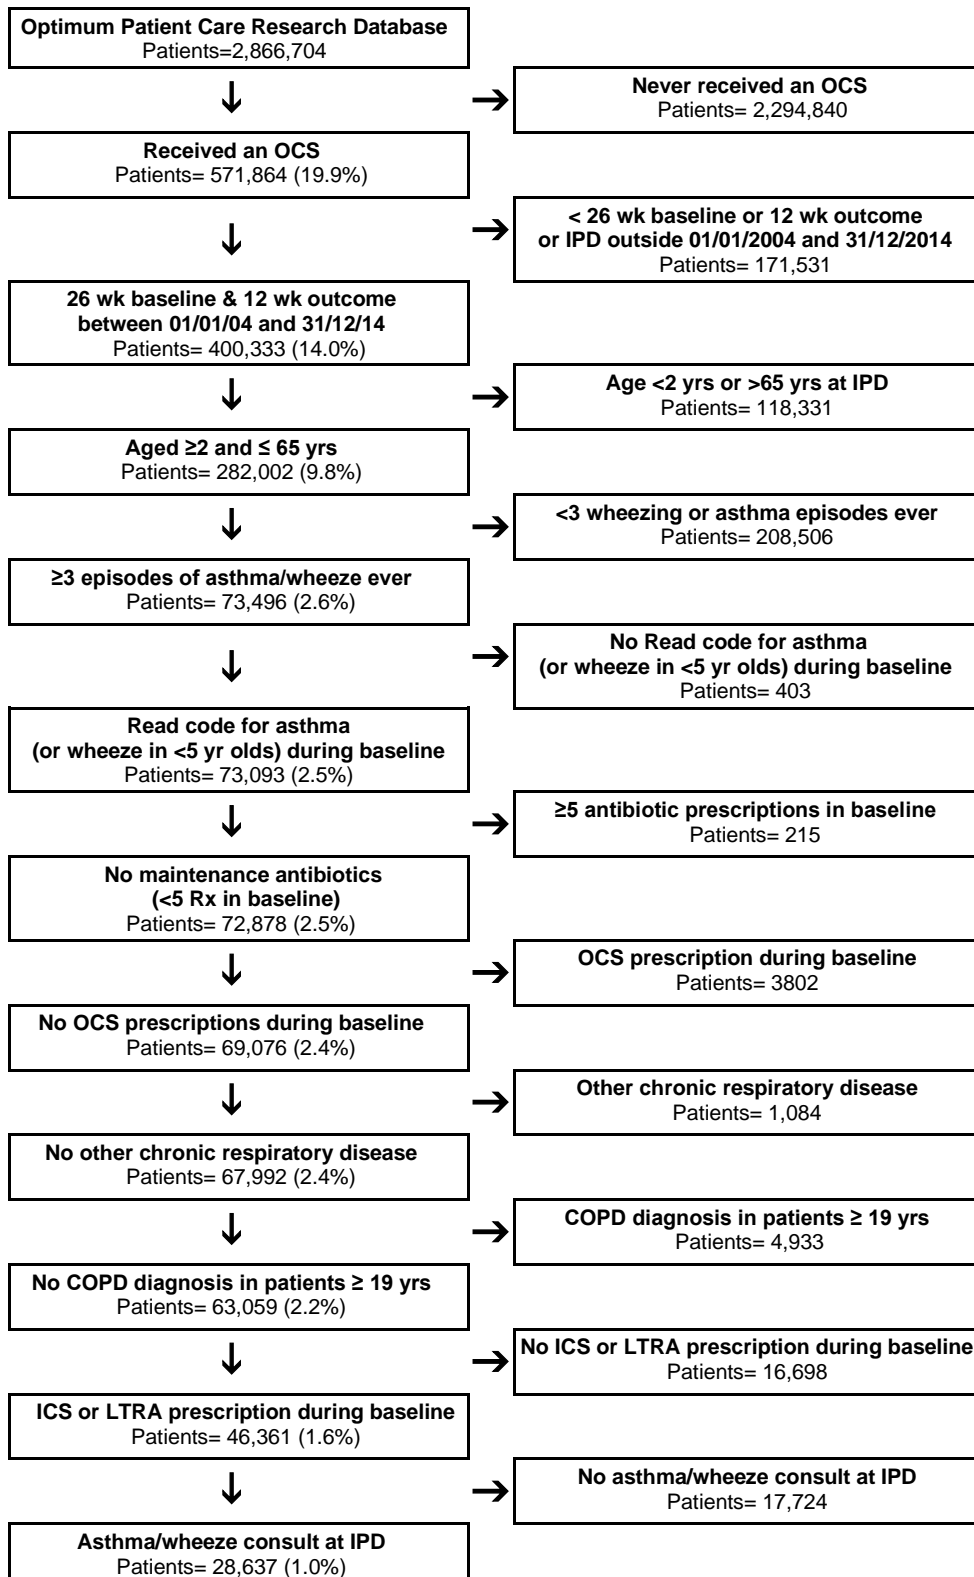

OCS: Oral Corticosteroid; IPD: Index Prescription Date; COPD: Chronic Obstructive Pulmonary Disease; ICS: Inhaled Corticosteroid; LTRA: Leukotriene Receptor Antagonist.
