# Supplementary material
Source: HighWire-hosted journal article supplement (https://erj.ersjournals.com/content/58/1/2003599)
Supplement: inline-supplementary-material-3 [file inline-supplementary-material-3.pdf]

Supplementary figure 2. Percentage of 2-18 year olds (n=2092 per group) and 19-65 year olds (n=10012 per group) with at least one primary care consultation

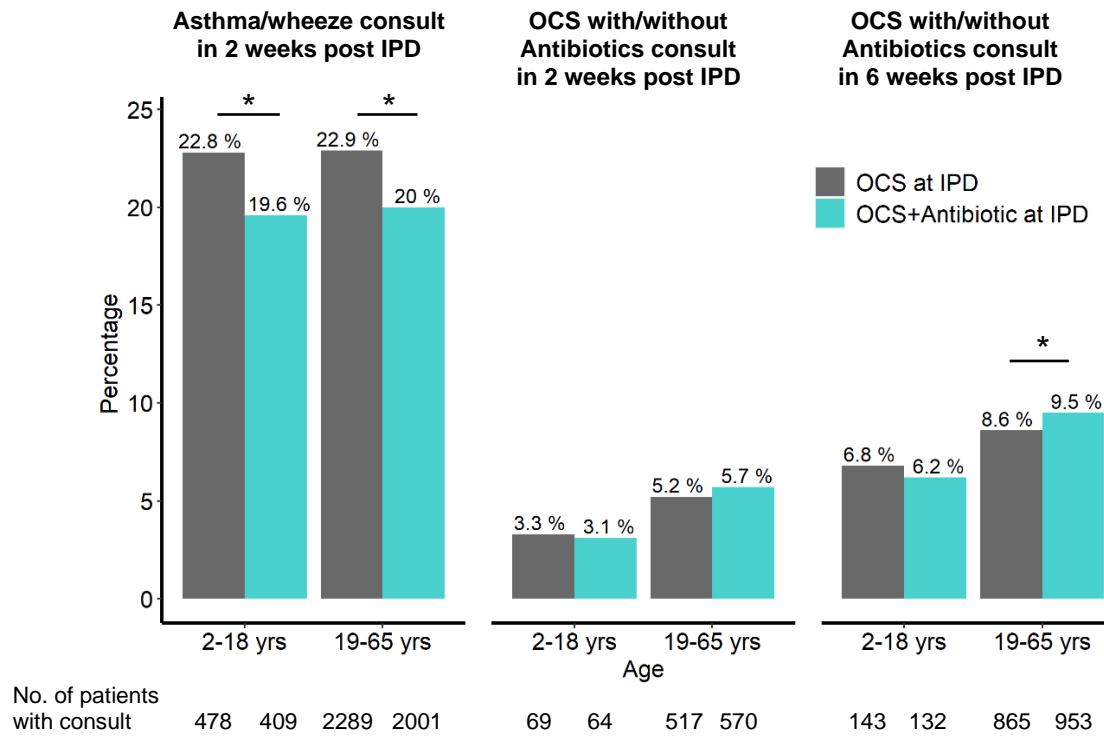

OCS: Oral Corticosteroids; IPD: Index Prescription Date. \*p<0.05
