# Supplementary material
Source: HighWire-hosted journal article supplement (https://erj.ersjournals.com/content/58/1/2003599)

Supplementary figure 3. Hazard ratios (95% CI) for oral corticosteroids (OCS) plus antibiotics compared to oral corticosteroids alone using time to OCS and/or antibiotics as the outcome measure.

a) In 19-65 yr olds (n=20,024)

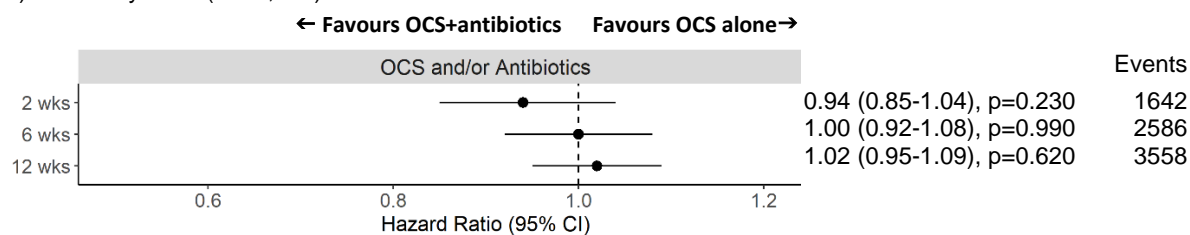

b) In 2-18 yr olds (n=4,184)

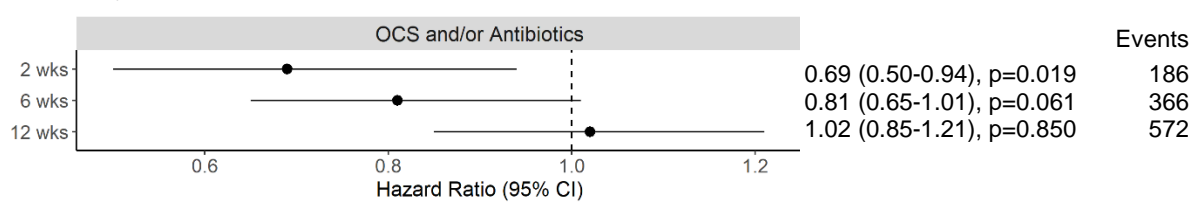

Supplement: inline-supplementary-material-4 [file inline-supplementary-material-4.pdf]
