# Supplementary material
Source: HighWire-hosted journal article supplement (https://erj.ersjournals.com/content/58/1/2003599)

Supplementary figure 4. Hazard ratios (95% CI) for oral corticosteroids (OCS) plus antibiotics compared to oral corticosteroids alone in adults with high (>0.2) and low (0-0.2) blood eosinophil count.

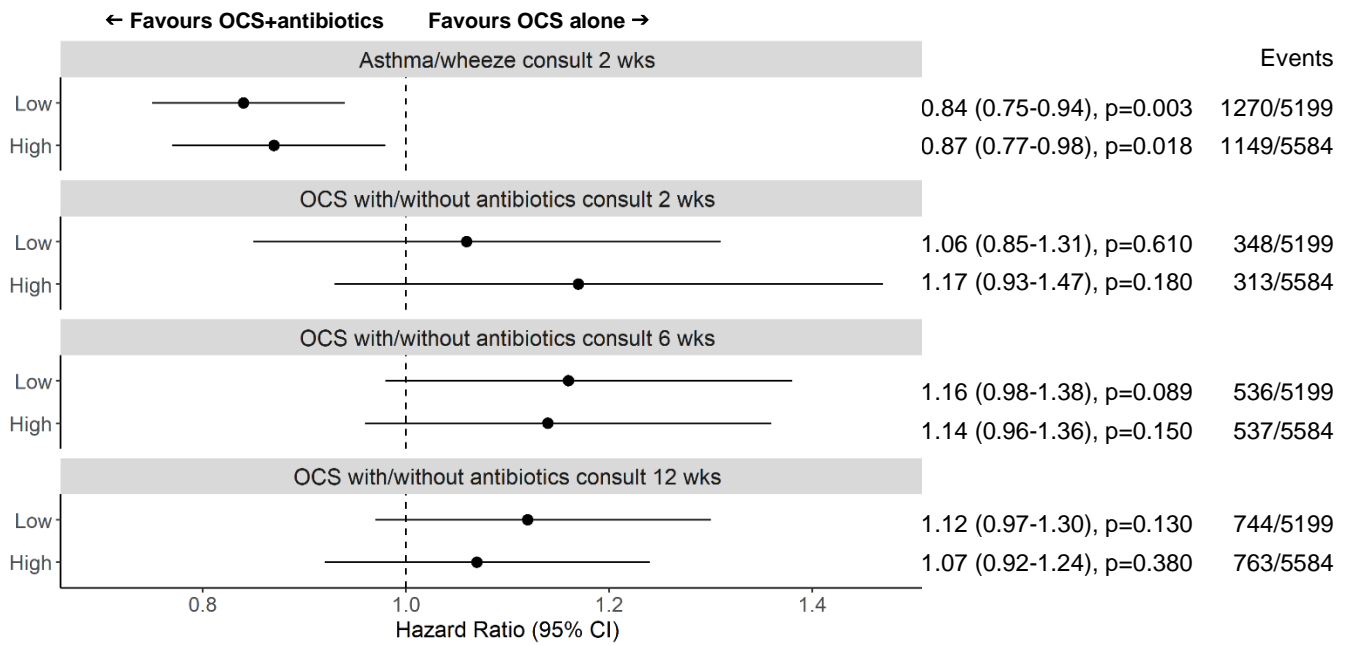

Supplement: inline-supplementary-material-5 [file inline-supplementary-material-5.pdf]
