# Supplementary material
Source: HighWire-hosted journal article supplement (https://erj.ersjournals.com/content/58/1/2003599)
Supplement: inline-supplementary-material-6 [file inline-supplementary-material-6.pdf]

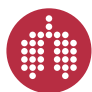

# A real-life comparative effectiveness study into the addition of antibiotics to the management of asthma exacerbations in primary care

SHAREABLE PDF

Clare S. Murray<sup>1</sup>, Sarah J. Lucas<sup>2</sup>, John Blakey<sup>3,4</sup>, Alan Kaplan<sup>5</sup>, Alberto Papi<sup>6</sup>, James Paton<sup>7</sup>, Wanda Phipatanakul<sup>8</sup>, David Price<sup>9,10</sup>, Oon Hoe Teoh<sup>11</sup>, Mike Thomas<sup>12</sup>, Steve Turner<sup>13</sup> and Nikolaos G. Papadopoulos<sup>1,14</sup>

<sup>1</sup>Division of Infection, Immunity and Respiratory Medicine, School of Biological Sciences, Faculty of Biology, Medicine and Health, University of Manchester, NIHR Manchester Biomedical Research Centre, Manchester University Hospitals NHS Foundation Trust, Manchester Academic Health Science Centre, Manchester, UK. <sup>2</sup>Respiratory Effectiveness Group, Ely, UK. <sup>3</sup>Respiratory Medicine, Sir Charles Gairdner Hospital, Perth, Australia. <sup>4</sup>Medical School, Curtin University, Perth, Australia. <sup>5</sup>Family Physician Airways Group of Canada, University of Toronto, Thornhill, ON, Canada. <sup>6</sup>Respiratory Medicine, Dept of Medical Sciences, University of Ferrara, Ferrara, Italy. <sup>7</sup>School of Medicine, University of Glasgow, Glasgow, UK. <sup>8</sup>Dept of Pediatrics, Boston Children's Hospital, Boston, MA, USA. <sup>9</sup>Observational and Pragmatic Research Institute, Singapore, Singapore. <sup>10</sup>Centre of Academic Primary Care, Division of Applied Health Sciences, University of Aberdeen, Aberdeen, UK. <sup>11</sup>Dept of Paediatrics, KK Women's and Children's Hospital, Singapore, Singapore. <sup>12</sup>Primary Care and Population Sciences, Faculty of Medicine, University of Southampton, Southampton, UK. <sup>13</sup>Child Health, University of Aberdeen, Aberdeen, UK. <sup>14</sup>Allergy Dept, 2nd Pediatric Clinic, National and Kapodistrian University of Athens, Athens, Greece.

Corresponding author: Nikolaos G. Papadopoulos ([nikolaos.papadopoulos@manchester.ac.uk](mailto:nikolaos.papadopoulos@manchester.ac.uk))

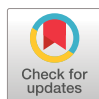

Shareable abstract (@ERSpublications)

**Antibiotics are regularly prescribed for asthma exacerbation; however, there is little clinical benefit to the routine addition of antibiotics to usual OCS treatment for managing asthma exacerbations in primary care patients** <https://bit.ly/2LVYbft>

**Cite this article as:** Murray CS, Lucas SJ, Blakey J, *et al.* A real-life comparative effectiveness study into the addition of antibiotics to the management of asthma exacerbations in primary care. *Eur Respir J* 2021; 58: 2003599 [DOI: 10.1183/13993003.03599-2020].

This single-page version can be shared freely online.

Copyright ©ERS 2021

This article has supplementary material available from [erj.ersjournals.com](http://erj.ersjournals.com)

This article has an editorial commentary: <https://doi.org/10.1183/13993003.00183-2021>

Received: 22 May 2020  
Accepted: 7 Dec 2020

## Abstract

**Background** Asthma exacerbations are major contributors to asthma morbidity and mortality. They are usually managed with bronchodilators and oral corticosteroids (OCS), but clinical trial evidence suggests that antibiotics could be beneficial. We aimed to assess whether treatment of asthma exacerbations with antibiotics in addition to OCS improved outcomes in larger, more representative routine-care populations.

**Method** A retrospective comparative effectiveness study into managing asthma exacerbations with OCS alone *versus* OCS plus antibiotics was conducted using the Optimum Patient Care Research Database. The dataset included 28637 patients; following propensity score matching 20024 adults and 4184 children were analysed.

**Results** Antibiotics in addition to OCS were prescribed for the treatment of asthma exacerbations in 45% of adults and 32% of children. Compared to OCS alone, OCS plus antibiotics was associated with reduced risk of having an asthma/wheeze consultation in the following 2 weeks (children hazard ratio (HR) 0.84 (95% CI 0.73–0.96),  $p=0.012$ ; adults HR 0.86 (95% CI 0.81–0.91),  $p<0.001$ ), but an increase in risk of a further OCS prescription for a new/ongoing exacerbation within 6 weeks in adults (HR 1.11 (95% CI 1.01–1.21),  $p=0.030$ ), but not children. Penicillins, but not macrolides, were associated with a reduction in the odds of a subsequent asthma/wheeze consultation compared to OCS alone, in both adults and children.

**Conclusion** Antibiotics were frequently prescribed in relation to asthma exacerbations, contrary to guideline recommendations. Overall, the routine addition of antibiotics to OCS in the management of asthma exacerbations appeared to confer little clinical benefit, especially when considering the risks of antibiotic overuse.
